# Supplementary material for: An experimental and computational study of the reaction between 2-methylallyl radicals and oxygen molecules: optimizing master equation parameters with trace fitting
Source: Royal Society of Chemistry journal article supplement (doi:10.1039/d1cp05591g), 2022-01-01
Supplement: d1cp05591g3.pdf [file d1cp05591g3.pdf]

# An Experimental and Computational Study of the Reaction Between 2-Methylallyl Radicals and Oxygen Molecules: Optimizing Master Equation Parameters with Trace Fitting

Timo T. Pekkanen<sup>a</sup>, Raimo S. Timonen<sup>a</sup>, Struan H. Robertson<sup>b</sup>, György  
Lendvay<sup>c</sup>, Satya P. Joshi<sup>a</sup>, Timo T. Reijonen<sup>a</sup>, Arkke J. Eskola<sup>a,\*</sup>

<sup>a</sup>*Department of Chemistry, University of Helsinki, P.O. Box 55 (A.I. Virtasen aukio 1),  
00014 Helsinki, Finland*

<sup>b</sup>*Dassault Systèmes, 334 Science Park, Cambridge CB4 0WN, U.K.*

<sup>c</sup>*Institute of Materials and Environmental Chemistry, Research Centre for Natural  
Sciences, Magyar Tudósok krt. 2., Budapest H-1117, Hungary*

---

## Supplemental Material

---

---

\*Corresponding author:

*Email address:* [arkke.eskola@helsinki.fi](mailto:arkke.eskola@helsinki.fi) (Arkke J. Eskola)

Table S1: The Experimental Conditions and Results of  $\text{CH}_2\text{C}(\text{CH}_3)\text{CH}_2^\bullet + \text{O}_2$  Bimolecular Rate Coefficient Measurements.

| $T$<br>(K)           | $p_M$<br>(Torr) | $[\text{M}]$<br>( $\text{cm}^{-3}$ )<br>$10^{16}$ | $[\text{Pr}]^a$<br>( $\text{cm}^{-3}$ )<br>$10^{12}$ | $[\text{O}_2]$<br>( $\text{cm}^{-3}$ )<br>$10^{13}$ | $k'^b$<br>( $\text{s}^{-1}$ ) | $k_w^c$<br>( $\text{s}^{-1}$ ) | $k_w^d$<br>( $\text{s}^{-1}$ ) | $k_f^e$<br>( $\text{cm}^3 \text{ s}^{-1}$ )<br>$10^{-14}$ |
|----------------------|-----------------|---------------------------------------------------|------------------------------------------------------|-----------------------------------------------------|-------------------------------|--------------------------------|--------------------------------|-----------------------------------------------------------|
| 203 <sup>g,i,o</sup> | 0.20            | 0.966                                             | 12.5                                                 | 3.40 – 8.53                                         | 53.9 – 105                    | 14.8 ± 1.1                     | 15.2 ± 2.5                     | 108 ± 5                                                   |
| 203 <sup>g,i,o</sup> | 0.37            | 1.77                                              | 20.0                                                 | 2.94 – 10.3                                         | 55.5 – 144                    | 14.9 ± 0.9                     | 16.3 ± 2.5                     | 122 ± 4                                                   |
| 203 <sup>g,n,o</sup> | 0.39            | 1.84                                              | 4.26                                                 | 1.93 – 5.05                                         | 32.1 – 77.3                   | 7.52 ± 0.87                    | 6.73 ± 1.25                    | 140 ± 4                                                   |
| 203 <sup>g,i,o</sup> | 0.77            | 3.68                                              | 18.7                                                 | 3.42 – 9.78                                         | 81.6 – 180                    | 16.3 ± 0.9                     | 17.6 ± 2.8                     | 168 ± 5                                                   |
| 203 <sup>g,n,o</sup> | 0.78            | 3.69                                              | 4.25                                                 | 1.98 – 4.14                                         | 40.6 – 81.7                   | 5.79 ± 0.74                    | 5.55 ± 1.30                    | 178 ± 5                                                   |
| 203 <sup>g,i,o</sup> | 1.30            | 6.19                                              | 17.3                                                 | 2.86 – 10.1                                         | 64.6 – 177                    | 19.0 ± 0.7                     | 21.1 ± 2.7                     | 155 ± 4                                                   |
| 203 <sup>g,n,o</sup> | 1.32            | 6.30                                              | 4.41                                                 | 1.61 – 3.64                                         | 39.1 – 82.0                   | 8.89 ± 0.73                    | 8.09 ± 1.07                    | 197 ± 5                                                   |
| 203 <sup>h,i,o</sup> | 2.26            | 10.8                                              | 33.1                                                 | 1.52 – 6.68                                         | 47.3 – 134                    | 19.5 ± 1.7                     | 21.0 ± 5.0                     | 182 ± 14                                                  |
| 203 <sup>h,i,o</sup> | 3.17            | 15.1                                              | 31.0                                                 | 1.01 – 4.51                                         | 40.8 – 112                    | 20.6 ± 1.7                     | 19.5 ± 2.3                     | 196 ± 10                                                  |
| 203 <sup>h,i,o</sup> | 4.31            | 20.5                                              | 60.3                                                 | 1.25 – 3.50                                         | 44.8 – 85.1                   | 20.5 ± 1.8                     | 21.0 ± 2.0                     | 193 ± 10                                                  |
| 203 <sup>h,i,o</sup> | 6.29            | 29.9                                              | 66.1                                                 | 2.06 – 9.03                                         | 71.8 – 235                    | 19.8 ± 1.3                     | 21.6 ± 2.6                     | 238 ± 6                                                   |
| 220 <sup>g,i,o</sup> | 0.85            | 3.73                                              | 35.5                                                 | 3.32 – 8.46                                         | 44.5 – 111                    | 6.81 ± 1.44                    | 7.58 ± 5.39                    | 122 ± 10                                                  |
| 243 <sup>g,i,o</sup> | 0.25            | 0.981                                             | 21.8                                                 | 5.29 – 20.8                                         | 36.0 – 113                    | 7.83 ± 1.00                    | 11.0 ± 6.6                     | 53.0 ± 5.0                                                |
| 243 <sup>g,i,o</sup> | 0.46            | 1.81                                              | 22.1                                                 | 5.14 – 14.9                                         | 46.7 – 133                    | 7.64 ± 1.07                    | 5.29 ± 1.87                    | 84.6 ± 2.1                                                |
| 243 <sup>g,i,o</sup> | 0.95            | 3.78                                              | 22.6                                                 | 2.31 – 8.74                                         | 35.6 – 113                    | 5.16 ± 0.76                    | 6.17 ± 2.32                    | 122 ± 4                                                   |
| 243 <sup>g,n,o</sup> | 1.58            | 6.27                                              | 4.12                                                 | 1.84 – 5.83                                         | 27.2 – 82.1                   | 3.19 ± 0.70                    | 2.42 ± 1.27                    | 136 ± 4                                                   |
| 243 <sup>g,i,o</sup> | 1.61            | 6.38                                              | 23.9                                                 | 2.87 – 11.8                                         | 41.6 – 144                    | 4.83 ± 0.89                    | 7.88 ± 5.24                    | 119 ± 8                                                   |
| 233 <sup>h,i,o</sup> | 2.69            | 11.1                                              | 54.0                                                 | 1.61 – 4.72                                         | 36.7 – 81.1                   | 11.3 ± 0.9                     | 11.4 ± 2.40                    | 154 ± 9                                                   |
| 233 <sup>h,i,o</sup> | 3.84            | 15.9                                              | 54.5                                                 | 1.53 – 5.26                                         | 60.0 – 106                    | 12.1 ± 1.3                     | 12.3 ± 1.6                     | 174 ± 5                                                   |
| 243 <sup>h,i,o</sup> | 5.16            | 20.5                                              | 44.3                                                 | 2.03 – 4.63                                         | 47.2 – 94.0                   | 9.54 ± 1.19                    | 9.61 ± 0.95                    | 182 ± 3                                                   |
| 243 <sup>h,i,o</sup> | 7.60            | 30.2                                              | 64.3                                                 | 3.70 – 5.40                                         | 83.0 – 115                    | 10.6 ± 0.7                     | 10.8 ± 0.3                     | 194 ± 8                                                   |
| 266 <sup>d,k,o</sup> | 1.04            | 3.78                                              | 13.8                                                 | 7.19 – 12.8                                         | 51.6 – 105                    | 7.03 ± 0.60                    | 6.41 ± 1.49                    | 74.7 ± 1.9                                                |
| 298 <sup>g,i,o</sup> | 0.27            | 0.883                                             | 7.15                                                 | 12.8 – 35.3                                         | 41.4 – 105                    | 7.98 ± 0.75                    | 7.11 ± 1.47                    | 27.4 ± 0.7                                                |
| 303 <sup>i,i,o</sup> | 0.57            | 1.81                                              | 3.25                                                 | 8.57 – 29.2                                         | 41.1 – 107                    | 10.1 ± 1.33                    | 11.4 ± 3.3                     | 34.9 ± 2.0                                                |
| 298 <sup>h,m,o</sup> | 0.57            | 1.84                                              | 4.69                                                 | 10.9 – 32.6                                         | 42.6 – 121                    | 8.11 ± 0.30                    | 7.31 ± 1.45                    | 34.2 ± 0.8                                                |
| 298 <sup>g,n,o</sup> | 0.57            | 1.85                                              | 7.95                                                 | 7.39 – 32.1                                         | 36.4 – 132                    | 4.43 ± 1.58                    | 4.62 ± 5.17                    | 37.4 ± 2.7                                                |
| 298 <sup>g,i,o</sup> | 0.57            | 1.85                                              | 7.95                                                 | 8.71 – 29.2                                         | 34.5 – 116                    | 5.03 ± 0.80                    | 4.51 ± 3.89                    | 37.1 ± 2.1                                                |
| 298 <sup>g,i,o</sup> | 1.17            | 3.79                                              | 9.01                                                 | 6.37 – 16.5                                         | 38.7 – 86.7                   | 7.14 ± 0.55                    | 8.20 ± 1.83                    | 48.7 ± 1.8                                                |
| 298 <sup>g,i,o</sup> | 1.98            | 6.40                                              | 7.72                                                 | 4.28 – 12.9                                         | 31.2 – 86.7                   | 6.36 ± 0.54                    | 5.49 ± 0.83                    | 62.6 ± 1.1                                                |
| 304 <sup>k,i,o</sup> | 2.86            | 9.09                                              | 3.75                                                 | 7.29 – 26.3                                         | 64.8 – 192                    | 12.0 ± 0.6                     | 13.5 ± 1.9                     | 68.3 ± 1.3                                                |
| 298 <sup>h,i,o</sup> | 3.39            | 11.0                                              | 28.5                                                 | 4.04 – 12.9                                         | 52.3 – 115                    | 15.5 ± 1.2                     | 19.7 ± 3.7                     | 76.6 ± 5.4                                                |
| 298 <sup>h,m,o</sup> | 4.69            | 15.2                                              | 12.6                                                 | 4.01 – 15.5                                         | 47.7 – 147                    | 6.87 ± 0.92                    | 8.72 ± 1.76                    | 90.5 ± 1.9                                                |
| 298 <sup>h,i,o</sup> | 6.38            | 20.7                                              | 42.7                                                 | 3.64 – 9.19                                         | 46.4 – 98.4                   | 6.20 ± 0.83                    | 6.81 ± 2.53                    | 103 ± 5                                                   |
| 298 <sup>h,m,o</sup> | 9.23            | 29.9                                              | 28.1                                                 | 3.79 – 8.83                                         | 60.3 – 120                    | 9.42 ± 0.72                    | 10.4 ± 1.3                     | 126 ± 3                                                   |
| 304 <sup>k,i,p</sup> | 0.88            | 2.78                                              | 4.43                                                 | 5.77 – 18.8                                         | 43.0 – 125                    | 12.1 ± 0.8                     | 11.7 ± 3.5                     | 62.7 ± 3.3                                                |
| 304 <sup>k,i,p</sup> | 0.92            | 2.92                                              | 9.81                                                 | 8.73 – 22.4                                         | 81.0 – 176                    | 22.7 ± 0.7                     | 22.4 ± 1.1                     | 68.6 ± 0.9                                                |
| 304 <sup>k,i,p</sup> | 1.38            | 4.38                                              | 7.73                                                 | 4.23 – 17.0                                         | 46.6 – 146                    | 13.2 ± 0.7                     | 13.4 ± 1.2                     | 77.3 ± 1.3                                                |
| 304 <sup>k,i,p</sup> | 1.88            | 5.96                                              | 7.19                                                 | 6.76 – 12.2                                         | 67.5 – 121                    | 12.6 ± 0.9                     | 11.5 ± 2.2                     | 88.3 ± 2.9                                                |
| 304 <sup>k,i,p</sup> | 1.90            | 6.04                                              | 8.99                                                 | 8.26 – 19.3                                         | 86.9 – 191                    | 18.2 ± 1.0                     | 17.7 ± 4.0                     | 87.2 ± 3.5                                                |

<sup>a</sup> Radical precursor used was 3-bromo-2-methylpropene kept at around  $-7^\circ\text{C}$ . KrF (248 nm) laser used for photolysis.

<sup>b</sup> The pseudo first-order rate coefficient  $k' = k[\text{O}_2] + k_w$ .

<sup>c</sup> Average of measured wall rates. Stated uncertainty is the average standard error ( $1\sigma$ ) of the fits. Wall rate is the radical decay rate in the absence of added oxygen.

<sup>d</sup> Wall rate determined from the linear fit  $y$ -axis intercept of the bimolecular plot. Stated uncertainty is the standard error ( $1\sigma$ ) of the fit.

<sup>e</sup> Experimentally determined bimolecular rate coefficient (slope of the bimolecular plot). Stated uncertainty is the standard error ( $1\sigma$ ) of the linear fit. Estimated overall uncertainty is  $\pm 15\%$ .

<sup>f</sup> Bimolecular rate coefficient calculated by our master equation model.

<sup>g</sup> Reactor:  $d = 1.7$  cm, stainless steel, halocarbon wax coating.

<sup>h</sup> Reactor:  $d = 0.8$  cm, stainless steel, halocarbon wax coating.

<sup>i</sup> Reactor:  $d = 1.70$  cm, quartz, boric oxide coating

<sup>j</sup> Reactor:  $d = 1.65$  cm, Pyrex, polydimethylsiloxane coating.

<sup>k</sup> Reactor:  $d = 0.85$  cm, quartz, boric oxide coating

<sup>l</sup> Detection: chlorine lamp with a  $\text{CaF}_2$  window.

<sup>m</sup> Detection: chlorine lamp with a  $\text{BaF}_2$  window.

<sup>n</sup> Detection: xenon lamp with a sapphire window.

<sup>o</sup> He used as buffer gas.

<sup>p</sup>  $\text{N}_2$  used as buffer gas.

Table S2: The Experimental Conditions and Results of  $\text{CH}_2\text{C}(\text{CH}_3)\text{CH}_2^\bullet + \text{O}_2 \xrightleftharpoons[k_r]{k_f} \text{CH}_2\text{C}(\text{CH}_3)\text{CH}_2\text{OO}^\bullet$  Equilibrium Constant Measurements.

| $T$<br>(K)           | $p$<br>(Torr) | [M]<br>( $\text{cm}^{-3}$ )<br>$10^{16}$ | [O <sub>2</sub> ]<br>( $\text{cm}^{-3}$ )<br>$10^{14}$ | $k_w^a$<br>( $\text{s}^{-1}$ ) | $k_p^b$<br>( $\text{s}^{-1}$ ) | $k_f^c$<br>( $\text{cm}^3 \text{ s}^{-1}$ )<br>$10^{-14}$ | $k_r^d$<br>( $\text{s}^{-1}$ ) | $\ln(K)^e$    | $f(T)^f$<br>$10^{-4}$ |
|----------------------|---------------|------------------------------------------|--------------------------------------------------------|--------------------------------|--------------------------------|-----------------------------------------------------------|--------------------------------|---------------|-----------------------|
| 347 <sup>g,j</sup>   | 0.69          | 1.92                                     | 4.58                                                   | 6.83 ± 0.45                    | 19.8 ± 3.3                     | 18.7 ± 2.0                                                | 19.9 ± 9.4                     | 12.19 ± 0.49  | -7.382                |
| 351 <sup>h,k</sup>   | 0.71          | 1.96                                     | 5.84                                                   | 12.3 ± 0.5                     | 26.3 ± 5.5                     | 16.9 ± 1.9                                                | 14.6 ± 12.2                    | 12.39 ± 0.85  | -8.353                |
| 351 <sup>h,k</sup>   | 0.74          | 2.03                                     | 10.8                                                   | 11.5 ± 0.6                     | 28.5 ± 5.4                     | 17.6 ± 1.7                                                | 17.5 ± 15.8                    | 12.24 ± 0.91  | -8.3533               |
| 354 <sup>g,j</sup>   | 0.69          | 1.89                                     | 2.53                                                   | 8.25 ± 0.37                    | 23.6 ± 8.5                     | 14.0 ± 3.1                                                | 18.0 ± 16.1                    | 11.98 ± 0.92  | -9.528                |
| 354 <sup>g,j</sup>   | 0.70          | 1.92                                     | 5.20                                                   | 6.81 ± 0.42                    | 18.4 ± 3.7                     | 17.4 ± 2.1                                                | 24.5 ± 12.6                    | 11.88 ± 0.53  | -9.528                |
| 357 <sup>h,k</sup>   | 0.74          | 2.00                                     | 9.13                                                   | 11.8 ± 0.7                     | 28.9 ± 4.8                     | 16.3 ± 1.7                                                | 21.3 ± 14.9                    | 11.95 ± 0.71  | -10.25                |
| 358 <sup>g,j</sup>   | 0.71          | 1.92                                     | 5.49                                                   | 7.14 ± 0.39                    | 18.2 ± 2.6                     | 16.6 ± 1.8                                                | 34.0 ± 10.8                    | 11.50 ± 0.33  | -10.29                |
| 363 <sup>g,k</sup>   | 0.54          | 1.43                                     | 13.1                                                   | 7.59 ± 0.64                    | 14.4 ± 4.5                     | 10.5 ± 1.4                                                | 21.3 ± 17.4                    | 11.50 ± 0.83  | -12.37                |
| 363 <sup>g,j</sup>   | 0.73          | 1.93                                     | 6.15                                                   | 7.06 ± 0.38                    | 17.4 ± 2.1                     | 15.7 ± 1.6                                                | 43.7 ± 10.9                    | 11.18 ± 0.27  | -12.37                |
| 368 <sup>h,k</sup>   | 0.77          | 2.01                                     | 9.18                                                   | 11.6 ± 0.5                     | 20.8 ± 1.5                     | 13.8 ± 1.2                                                | 36.8 ± 7.0                     | 11.21 ± 0.21  | -14.12                |
| 368 <sup>g,j</sup>   | 0.73          | 1.92                                     | 6.66                                                   | 6.59 ± 0.37                    | 16.6 ± 1.7                     | 16.4 ± 1.6                                                | 63.7 ± 12.1                    | 10.83 ± 0.22  | -14.12                |
| 368 <sup>g,k</sup>   | 0.74          | 1.94                                     | 6.74                                                   | 5.92 ± 0.31                    | 19.5 ± 2.4                     | 18.4 ± 2.0                                                | 69.6 ± 17.8                    | 10.86 ± 0.28  | -14.12                |
| 373 <sup>g,k</sup>   | 0.75          | 1.95                                     | 7.41                                                   | 6.60 ± 0.28                    | 15.1 ± 2.1                     | 15.2 ± 1.8                                                | 73.3 ± 18.3                    | 10.60 ± 0.28  | -15.99                |
| 373 <sup>h,k</sup>   | 0.78          | 2.06                                     | 9.03                                                   | 10.2 ± 0.4                     | 23.3 ± 2.5                     | 11.7 ± 1.1                                                | 46.0 ± 10.8                    | 10.80 ± 0.25  | -15.99                |
| 378 <sup>g,k</sup>   | 0.77          | 1.96                                     | 8.44                                                   | 6.20 ± 0.37                    | 14.5 ± 1.9                     | 14.4 ± 1.6                                                | 80.9 ± 18.9                    | 10.43 ± 0.26  | -18.14                |
| 379 <sup>i,k</sup>   | 3.65          | 9.30                                     | 2.58                                                   | 9.95 ± 0.50                    | 16.1 ± 4.9                     | 16.5 ± 3.3                                                | 140 ± 36                       | 10.02 ± 0.32  | -18.47                |
| 383 <sup>g,k</sup>   | 0.78          | 1.97                                     | 9.15                                                   | 6.68 ± 0.38                    | 13.5 ± 2.0                     | 14.2 ± 1.8                                                | 116 ± 26                       | 10.04 ± 0.26  | -20.32                |
| 389 <sup>g,k</sup>   | 0.80          | 1.98                                     | 10.7                                                   | 6.15 ± 0.38                    | 13.6 ± 2.8                     | 13.0 ± 2.1                                                | 158 ± 45                       | 9.635 ± 0.327 | -23.06                |
| 393 <sup>g,k</sup>   | 0.86          | 2.11                                     | 11.5                                                   | 8.17 ± 0.25                    | 11.8 ± 1.2                     | 12.3 ± 1.2                                                | 157 ± 19                       | 9.573 ± 0.154 | -25.01                |
| 394 <sup>h,l</sup>   | 0.57          | 1.40                                     | 12.0                                                   | 10.2 ± 0.8                     | 26.1 ± 5.3                     | 9.21 ± 1.57                                               | 118 ± 36                       | 9.572 ± 0.347 | -25.90                |
| 394 <sup>h,k</sup>   | 0.57          | 1.41                                     | 12.2                                                   | 11.7 ± 1.1                     | 24.0 ± 5.4                     | 8.43 ± 1.48                                               | 96.0 ± 33.1                    | 9.689 ± 0.387 | -25.90                |
| 398 <sup>g,k</sup>   | 0.45          | 1.09                                     | 10.4                                                   | 6.81 ± 0.59                    | 14.0 ± 3.1                     | 8.15 ± 1.57                                               | 163 ± 34                       | 9.115 ± 0.285 | -27.68                |
| 398 <sup>g,k</sup>   | 0.81          | 1.97                                     | 10.4                                                   | 5.45 ± 0.31                    | 12.7 ± 3.7                     | 9.26 ± 2.02                                               | 201 ± 56                       | 9.034 ± 0.356 | -27.68                |
| 398 <sup>g,k</sup>   | 1.23          | 2.98                                     | 10.2                                                   | 6.33 ± 0.29                    | 12.1 ± 3.3                     | 10.9 ± 2.1                                                | 279 ± 66                       | 8.868 ± 0.308 | -27.68                |
| 403 <sup>g,k</sup>   | 0.83          | 1.98                                     | 9.70                                                   | 4.67 ± 0.40                    | 12.0 ± 3.8                     | 7.81 ± 1.78                                               | 249 ± 61                       | 8.637 ± 0.335 | -30.02                |
| 409 <sup>g,k</sup>   | 0.86          | 2.03                                     | 11.3                                                   | 4.06 ± 0.43                    | 30.4 ± 11.1                    | 7.39 ± 2.13                                               | 353 ± 105                      | 8.219 ± 0.415 | -33.97                |
| 409 <sup>g,k</sup>   | 0.87          | 2.04                                     | 12.1                                                   | 4.06 ± 0.43                    | 17.3 ± 5.1                     | 7.75 ± 1.71                                               | 273 ± 71                       | 8.523 ± 0.340 | -33.97                |
| 410 <sup>h,k</sup>   | 1.17          | 2.75                                     | 14.7                                                   | 12.5 ± 0.8                     | 25.1 ± 13.1                    | 6.12 ± 2.27                                               | 327 ± 148                      | 8.104 ± 0.585 | -34.82                |
| 384 <sup>i,k,m</sup> | 1.75          | 4.41                                     | 7.80                                                   | 20.5 ± 0.9                     | 18.0 ± 5.5                     | 25.6 ± 5.2                                                | 221 ± 87                       | 9.989 ± 0.441 | -20.84                |

<sup>a</sup> Average of measured wall rates. Stated uncertainty is the average standard error ( $1\sigma$ ) of the fits.

<sup>b</sup> Irreversible first order loss rate for  $\text{CH}_2\text{C}(\text{CH}_3)\text{CH}_2\text{OO}^\bullet$ . Propagation of error used to obtain the uncertainty.

<sup>c</sup> The bimolecular rate coefficient for the forward reaction. Propagation of error used to obtain the uncertainty.

<sup>d</sup> Unimolecular rate coefficient for the reverse reaction. Propagation of error used to obtain the uncertainty.

<sup>e</sup> Gases are assumed to be ideal and the standard state has been chosen as pure gas at 1 bar ( $p^\ominus = 1 \text{ bar}$ ) at the temperature of interest. Propagation of error used to obtain the uncertainty. Estimated overall uncertainty is  $\pm 15\%$ .

<sup>f</sup> Value of the correction function [see equation (21) in main text].

<sup>g</sup> Reactor:  $d = 1.65 \text{ cm}$ , Pyrex, polydimethylsiloxane coating.

<sup>h</sup> Reactor:  $d = 1.70 \text{ cm}$ , quartz, boric oxide coating

<sup>i</sup> Reactor:  $d = 0.85 \text{ cm}$ , quartz, boric oxide coating

<sup>j</sup> Detection: chlorine lamp with a  $\text{BaF}_2$  window.

<sup>k</sup> Detection: chlorine lamp with a  $\text{CaF}_2$  window.

<sup>l</sup> Detection: xenon lamp with a sapphire window.

<sup>m</sup>  $\text{N}_2$  used as buffer gas.

Table S3: Values of the Fit Parameters for the Double Exponential Fitting Function  $[R^\bullet](t) = A + Be^{-\lambda_1 t} + Ce^{-\lambda_2 t}$ .

| $T$<br>(K) | $p$<br>(Torr) | $\lambda_1$<br>( $s^{-1}$ ) | $\lambda_2$<br>( $s^{-1}$ ) | $A$       | $B$                  | $C$                  |
|------------|---------------|-----------------------------|-----------------------------|-----------|----------------------|----------------------|
| 347        | 0.69          | 114.9877 ± 6.422            | 17.0742 ± 2.1999            | 1461.6111 | 1470.1227 ± 41.5486  | 441.1227 ± 50.5904   |
| 351        | 0.71          | 127.7201 ± 6.9466           | 24.3262 ± 4.0719            | 94.1912   | 434.0637 ± 13.7207   | 82.8483 ± 16.2968    |
| 351        | 0.74          | 221.3157 ± 8.8555           | 26.9365 ± 4.4958            | 100.6765  | 444.635 ± 9.6231     | 48.3591 ± 7.9139     |
| 354        | 0.69          | 67.8377 ± 11.352            | 17.3383 ± 3.035             | 2072.2917 | 1604.0523 ± 296.5284 | 1478.4288 ± 323.5545 |
| 354        | 0.70          | 124.3734 ± 9.1509           | 15.6997 ± 2.2828            | 1581.1111 | 1376.0877 ± 45.4979  | 459.7239 ± 53.0616   |
| 357        | 0.74          | 183.8175 ± 9.8338           | 26.5317 ± 3.5386            | 65.1944   | 284.2304 ± 7.203     | 50.2003 ± 7.0739     |
| 358        | 0.71          | 135.7581 ± 8.3377           | 14.9966 ± 1.3316            | 1600.7037 | 1412.5415 ± 38.5773  | 628.4762 ± 40.7403   |
| 363        | 0.54          | 167.7005 ± 12.0111          | 13.4157 ± 3.5744            | 139.4769  | 291.4314 ± 9.6817    | 49.0268 ± 7.8894     |
| 363        | 0.73          | 151.0271 ± 8.8132           | 14.0054 ± 0.91787           | 1581.6852 | 1424.4017 ± 38.8251  | 746.2006 ± 32.2663   |
| 368        | 0.77          | 177.6665 ± 5.2369           | 18.6297 ± 0.87351           | 269.5692  | 1194.5538 ± 16.5167  | 388.3467 ± 14.4145   |
| 368        | 0.73          | 183.3918 ± 10.1639          | 12.8033 ± 0.58087           | 1533.6111 | 1339.3342 ± 40.1995  | 877.2237 ± 22.6107   |
| 368        | 0.74          | 204.4506 ± 14.9105          | 14.4061 ± 0.67285           | 898.3148  | 936.7394 ± 44.7643   | 606.6284 ± 17.4537   |
| 373        | 0.75          | 195.9915 ± 15.4997          | 11.6377 ± 0.65781           | 1111.8704 | 943.0978 ± 45.8937   | 671.6817 ± 19.4814   |
| 373        | 0.78          | 165.9019 ± 8.6222           | 19.0793 ± 1.071             | 164.6769  | 555.7099 ± 13.6234   | 289.071 ± 13.4036    |
| 378        | 0.76          | 211.5434 ± 16.0576          | 11.0736 ± 0.48362           | 1260.5556 | 1137.6324 ± 68.5544  | 824.8424 ± 17.5058   |
| 379        | 3.65          | 197.6568 ± 34.5487          | 11.3522 ± 0.3143            | 276.5932  | 228.7532 ± 22.5888   | 805.5799 ± 11.0855   |
| 383        | 0.78          | 255.9033 ± 22.7849          | 10.2197 ± 0.37694           | 1368.0741 | 1091.3235 ± 83.2263  | 1037.3931 ± 16.4603  |
| 389        | 0.80          | 307.0864 ± 39.5679          | 9.5802 ± 0.34023            | 1383.0926 | 924.9608 ± 120.2193  | 1107.6658 ± 15.4469  |
| 393        | 0.86          | 308.6234 ± 16.9510          | 9.8777 ± 0.21091            | 2407.3333 | 3487.5462 ± 182.4596 | 3971.9217 ± 28.9583  |
| 394        | 0.57          | 247.4149 ± 31.8409          | 17.618 ± 0.66557            | 84.9848   | 192.3173 ± 16.0448   | 234.9228 ± 6.0842    |
| 394        | 0.57          | 216.7614 ± 29.0947          | 17.8859 ± 0.97031           | 142.8859  | 187.0169 ± 13.615    | 197.1213 ± 7.678     |
| 398        | 0.45          | 259.5052 ± 32.005           | 9.2037 ± 0.34721            | 1599.4386 | 996.3806 ± 90.0106   | 2029.3616 ± 25.3044  |
| 398        | 0.81          | 307.557 ± 52.6672           | 7.7563 ± 0.30698            | 1803.0566 | 951.5655 ± 160.8805  | 2080.1082 ± 22.7331  |
| 398        | 1.23          | 400.1305 ± 62.5391          | 7.9484 ± 0.23043            | 1988.7736 | 1180.3892 ± 174.8299 | 3052.9251 ± 23.524   |
| 403        | 0.83          | 334.9961 ± 58.9342          | 6.3457 ± 0.25898            | 3377.3922 | 1379.4587 ± 227.8499 | 4738.3923 ± 36.9004  |
| 409        | 0.86          | 462.1901 ± 101.85           | 8.8828 ± 0.19068            | 2434.7193 | 1207.866 ± 283.3556  | 5719.0813 ± 30.6732  |
| 409        | 0.87          | 380.6822 ± 67.6023          | 7.3538 ± 0.30174            | 2189.0189 | 945.336 ± 145.7007   | 2953.1675 ± 25.8853  |
| 410        | 1.17          | 438.9229 ± 143.4582         | 15.1502 ± 0.43604           | 190.6154  | 84.6101 ± 17.502     | 326.7437 ± 4.9748    |
| 384        | 1.75          | 440.0191 ± 76.8555          | 19.3247 ± 0.77223           | 123.4578  | 147.5588 ± 19.9137   | 161.7532 ± 4.1259    |

Uncertainties are the standard errors ( $1\sigma$ ) of the fit. Parameter  $A$  is the average signal background.

Table S4: Reaction enthalpies at zero kelvin ( $\Delta_r H_0^\ominus$ ) for the stationary points on the  $\text{CH}_2\text{C}(\text{CH}_3)\text{CH}_2^\bullet + \text{O}_2$  potential energy surface. The enthalpies are reported at various levels of theory. The coupled cluster and CASPT2 energies have been extrapolated to the complete basis set limit (see text for details).

| Species                                                                                            | MN15<br>(kJ mol <sup>-1</sup> ) | ROHF-CCSD(T) <sup>a</sup><br>(kJ mol <sup>-1</sup> ) | UHF-CCSD(T) <sup>b</sup><br>(kJ mol <sup>-1</sup> ) | ROHF-DLPNO-CCSD(T1) <sup>c</sup><br>(kJ mol <sup>-1</sup> ) | CASPT2 <sup>d,e</sup><br>(kJ mol <sup>-1</sup> ) | $\Delta$ ZPE<br>(kJ mol <sup>-1</sup> ) |
|----------------------------------------------------------------------------------------------------|---------------------------------|------------------------------------------------------|-----------------------------------------------------|-------------------------------------------------------------|--------------------------------------------------|-----------------------------------------|
| $\text{CH}_2\text{C}(\text{CH}_3)\text{CH}_2^\bullet + \text{O}_2 \longrightarrow \text{Products}$ |                                 |                                                      |                                                     |                                                             |                                                  |                                         |
| R                                                                                                  | 0                               | 0 (0.029, 0.017)                                     | 0 (0.025, 0.016; 0.95, 2.0)                         | 0 (0.028, 0.017)                                            |                                                  | 0                                       |
| P1                                                                                                 | -91.27                          | -79.81 (0.011, 0.013)                                | -81.25 (0.011, 0.0081; 0, 0.76)                     | -86.18 (0.011, 0.016)                                       |                                                  | 5.801                                   |
| P2                                                                                                 | -286.0                          | -287.0 (0.022, 0.015)                                | -287.5 (0.026, 0.015; 0.89, 0)                      | -288.8 (0.021, 0.015)                                       |                                                  | -1.262                                  |
| P3                                                                                                 | -150.8                          | -135.4 (0.018, 0.015)                                | -136.7 (0.016, 0.015; 0.76, 0)                      | -138.4 (0.017, 0.015)                                       |                                                  | 4.138                                   |
| P4                                                                                                 | -204.9                          | -212.2 (0.014, 0.013)                                | -213.6 (0.014, 0.0081; 0, 0.76)                     | -215.1 (0.013, 0.016)                                       |                                                  | 0.9456                                  |
| Int1                                                                                               | -94.41                          | -81.12 (0.025)                                       | -82.53 (0.022, 0.76)                                | -80.57 (0.023)                                              | <b>-81.12<sup>e</sup></b>                        | 18.86                                   |
| Int2                                                                                               | -84.48                          | -70.46 (0.023)                                       | -70.78 (0.022, 0.95)                                | -72.51 (0.022)                                              | -75.14 (0.78)                                    | 14.62                                   |
| Int3                                                                                               | -95.36                          | -71.30 (0.015)                                       | -72.66 (0.013, 0.77)                                | -73.73 (0.014)                                              | -71.11 (0.78)                                    | 18.90                                   |
| Int4                                                                                               | -26.07                          | -6.445 (0.015)                                       | -7.895 (0.014, 0.76)                                | -8.177 (0.014)                                              |                                                  | 14.82                                   |
| Int5                                                                                               | -220.9                          | -197.2 (0.017)                                       | -198.7 (0.015, 0.76)                                | -199.1 (0.016)                                              |                                                  | 16.79                                   |
| Int6                                                                                               | -104.1                          | -85.15 (0.024)                                       | -85.29 (0.023, 0.95)                                | -86.14 (0.023)                                              |                                                  | 12.11                                   |
| TS01                                                                                               | -0.5054                         | -5.588 (0.047)                                       | -6.736 (0.047, 0.81)                                | 10.12 (0.042)                                               |                                                  | 7.038                                   |
| TS12A                                                                                              | 4.493                           | 21.52 (0.027)                                        | 21.90 (0.030, 0.99)                                 | 23.30 (0.024)                                               | 13.88 (0.77)                                     | 4.598                                   |
| TS12B                                                                                              | 9.433                           | 27.81 (0.024)                                        |                                                     |                                                             | 22.16 (0.77)                                     | 4.318                                   |
| TS13                                                                                               | 16.67                           | 32.69 (0.026)                                        | 34.09 (0.033, 1.1)                                  | 35.07 (0.030)                                               | 26.57 (0.78)                                     | 15.01                                   |
| TS14                                                                                               | 26.31                           | 40.78 (0.025)                                        | 42.22 (0.031, 1.0)                                  | 28.70 (0.034)                                               |                                                  | 12.56                                   |
| TS16                                                                                               | 67.13                           | 81.54 (0.027)                                        | 81.78 (0.030, 1.0)                                  | 82.87 (0.025)                                               |                                                  | 1.917                                   |
| TS2P1                                                                                              | 71.27                           | 66.69 (0.026)                                        | 71.66 (0.042, 1.4)                                  | 68.31 (0.025)                                               | 56.93 (0.77)                                     | 7.259                                   |
| TS35                                                                                               | 15.27                           | 13.43 (0.070)                                        | 68.65 (0.058, 1.7)                                  | 39.24 (0.046)                                               | 23.85 (0.78)                                     | 8.397                                   |
| TS45                                                                                               | 49.15                           | 48.22 (0.036)                                        | 56.71 (0.042, 1.4)                                  | 52.11 (0.033)                                               |                                                  | 11.97                                   |
| TS4P2                                                                                              | 47.95                           | 70.34 (0.026)                                        | 72.03 (0.029, 1.0)                                  | 71.60 (0.024)                                               |                                                  | 9.120                                   |
| TS5P3                                                                                              | -155.8                          | -134.3 (0.022)                                       | -134.2 (0.025, 0.89)                                | -134.0 (0.021)                                              |                                                  | 10.34                                   |
| TS6P4                                                                                              | -102.7                          | -95.76 (0.030)                                       | -92.39 (0.039, 1.3)                                 | -92.91 (0.028)                                              |                                                  | 7.256                                   |
| $\text{Int2} + \text{O}_2 \longrightarrow \text{P5 (KHP} + \text{OH}^\bullet)$                     |                                 |                                                      |                                                     |                                                             |                                                  |                                         |
| Int2 + O <sub>2</sub>                                                                              | 0                               |                                                      |                                                     | 0 (0.022, 0.017)                                            |                                                  | 0                                       |
| P5                                                                                                 | -197.5                          |                                                      |                                                     | -210.8 (0.013, 0.016)                                       |                                                  | 1.085                                   |
| Int7                                                                                               | -94.11                          |                                                      |                                                     | -81.07 (0.022)                                              |                                                  | 18.75                                   |
| Int8                                                                                               | -104.6                          |                                                      |                                                     | -87.83 (0.021)                                              |                                                  | 11.24                                   |
| TS78a                                                                                              | -2.567                          |                                                      |                                                     | 17.39 (0.021)                                               |                                                  | 3.629                                   |
| TS78b                                                                                              | -5.292                          |                                                      |                                                     | 12.49 (0.021)                                               |                                                  | 2.141                                   |
| TS8P5                                                                                              | -103.8                          |                                                      |                                                     | -93.02 (0.023)                                              |                                                  | 8.061                                   |

<sup>a</sup> Value in the parentheses is the T1 diagnostic.

<sup>b</sup> Values in the parentheses are the T1 diagnostic and spin contamination, respectively.

<sup>c</sup> Value in the parentheses is the T1 diagnostic.

<sup>d</sup> Value in the parentheses is the reference weight.

<sup>e</sup> The CASPT2 energies here are reported relative to Int1. The relative energy of Int1 has been given its ROHF-CCSD(T) value.

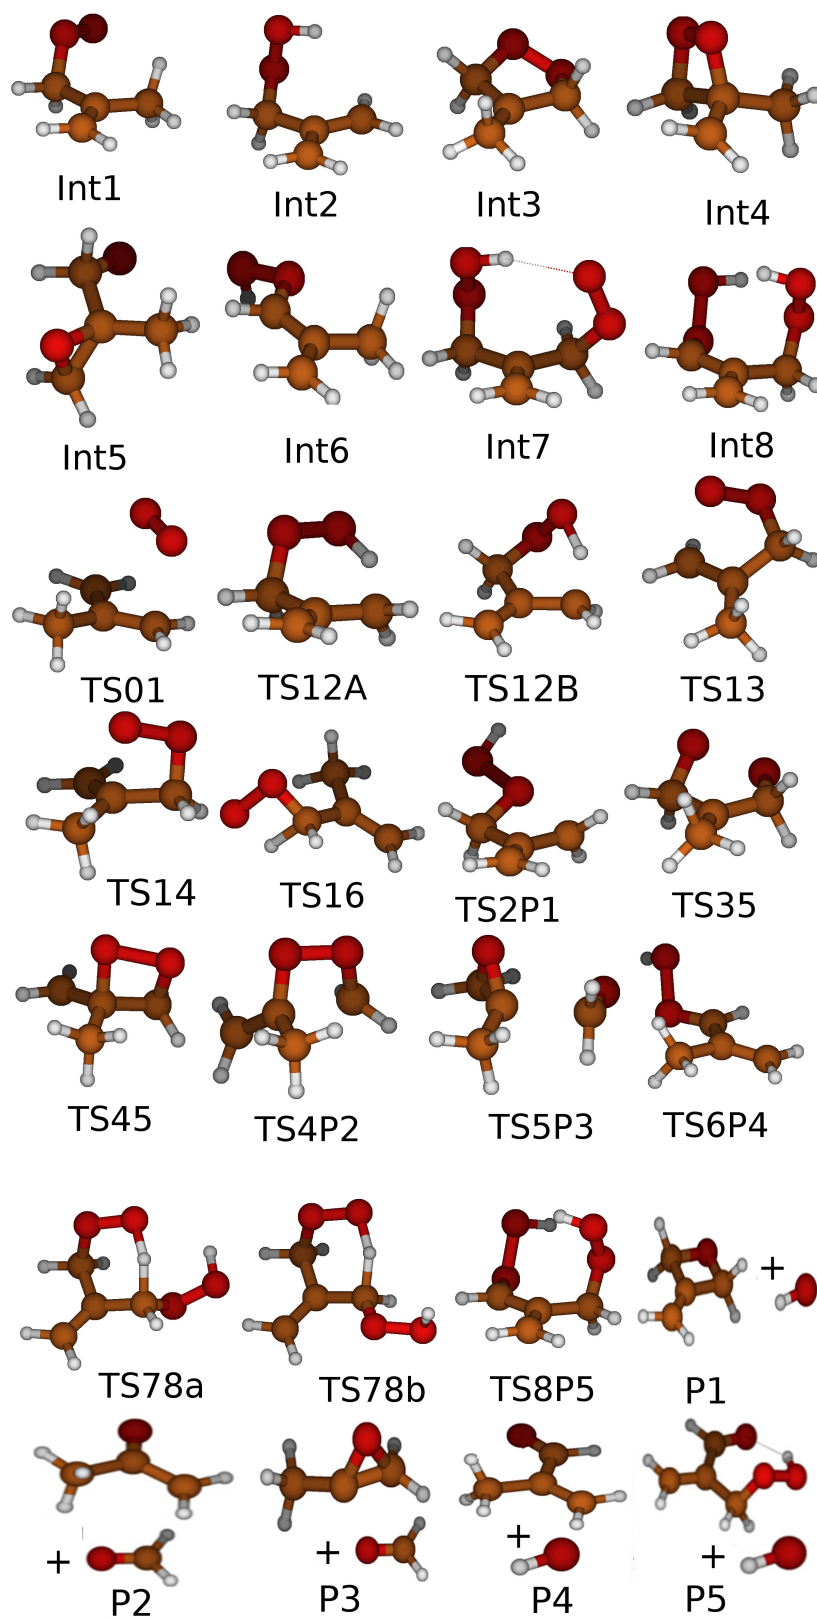

Figure S1: Structures of the stationary points on the  $\text{CH}_2\text{C}(\text{CH}_3)\text{CH}_2^\bullet + \text{O}_2$  potential energy surface.
